# Supplementary material for: Repulsive Force for Micro- and Nano-Non-Contact Manipulation
Source: MDPI journal article supplement (doi:10.3390/app13063886), 2023-03-18
Supplement: s1 [file s1]

# Repulsive Force for Micro- and Nano-Non-Contact Manipulation

Amélie Cot <sup>1,2</sup>, Patrick Rougeot <sup>1</sup>, Sophie Lakard <sup>2</sup>, Michaël Gauthier <sup>1,\*</sup> and Jérôme Dejeu <sup>1,3,\*</sup>

<sup>1</sup> FEMTO-ST Institute, SUPMICROTECH, CNRS, Université de Franche-Comté, 25000 Besançon, France

<sup>2</sup> UTINAM Institute, Université Franche-Comté, 16 Route de Gray, 25030 Besançon, France

<sup>3</sup> Université Grenoble Alpes, CNRS, DCM UMR-5250, 38000 Grenoble, France

\* Correspondence: michael.gauthier@femto-st.fr (M.G.); jerome.dejeu@univ-grenoble-alpes.fr (J.D.).

|                                                           |     |
|-----------------------------------------------------------|-----|
| Debye length                                              | S2  |
| Sphere-plan case modeling                                 | S2  |
| Triple electrical layer                                   | S3  |
| Double Electrical layer                                   | S3  |
| Influence of the band number on the sphere                | S4  |
| Force modelling versus sphere diameter and ionic strength | S5  |
| Force-distance curves for different polypyrrole film      | S6  |
| Electrodeposition localization                            | S7  |
| Current density                                           | S8  |
| SEM pictures                                              | S8  |
| Film morphology                                           | S9  |
| Repulsive force                                           | S10 |
| Electrophoresis simulation                                | S11 |
| Micro-object rotation                                     | S12 |

### Debye length

$$\kappa = \sqrt{\frac{\epsilon k_B T}{\sum_i q_i^2 C_i^0}} \quad (\text{SI-1})$$

Where  $\epsilon$  is the dielectric constant of the medium ( $\text{F.m}^{-1}$ ),  $k_B$  the Boltzmann constant,  $T$  the temperature (K),  $q_i$  the ion charge,  $C_i$  the ion concentration ( $\text{ion.m}^{-3}$ )

### Sphere-plan case modeling

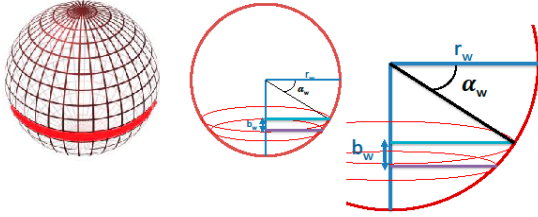

Figure S1: Band by band modeling of the sphere.

The elementary surface of the sphere  $dS_w$  is given by equation (SI-2):

$$dS_w = 2\pi \cdot r_w \cdot b_w \quad (\text{SI-2})$$

where  $w$  is the number of bands,  $b_w$  is the thickness of the band and  $r_w$  is the radius of the considered disk to the height of the band  $w$ :

$$r_w = r \cos(\alpha_w) \quad (\text{SI-3})$$

with  $\alpha_w$  is the angle of the band  $w$ .

The orthogonal distance between the charge of the sphere and the substrate is defined by:

$$h_w = z + b_w \cdot (w-1) + \frac{b_w}{2} \quad (\text{SI-4})$$

where  $z$  is the distance between the bottom of the sphere and the substrate.

## Triple Electrical layer

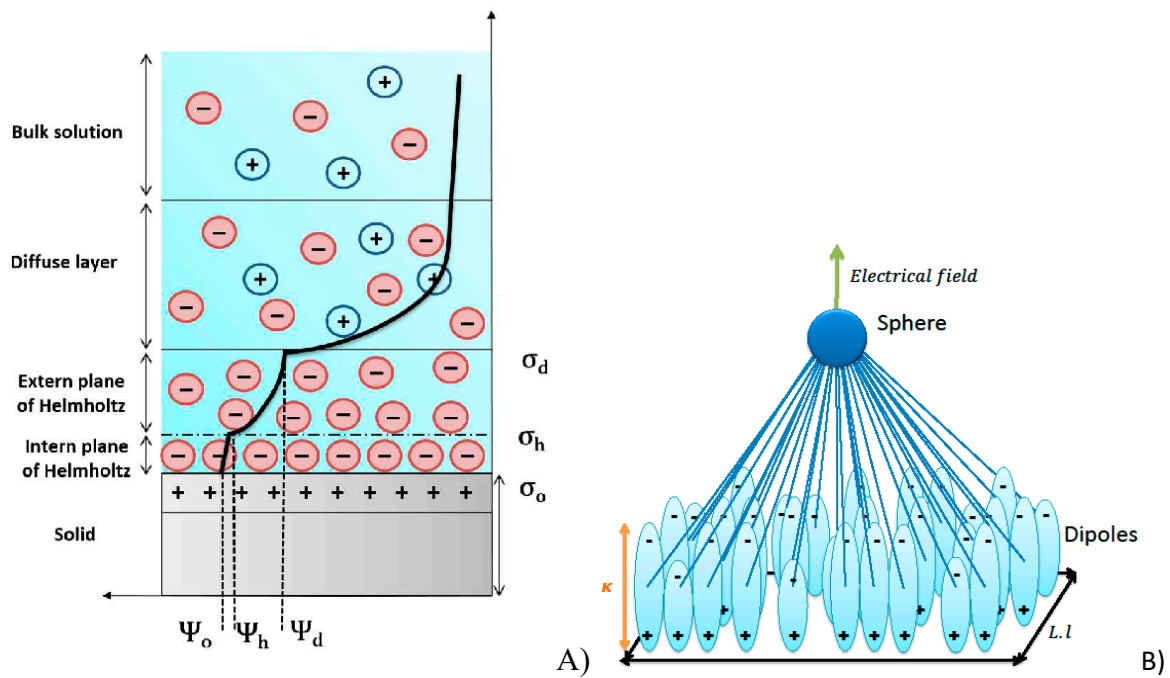

Figure S2: A) Ions distributions according to the triple electrical layer model; B) General modeling of interaction between charged micro-object and surface for this theory

## Double Electrical layer

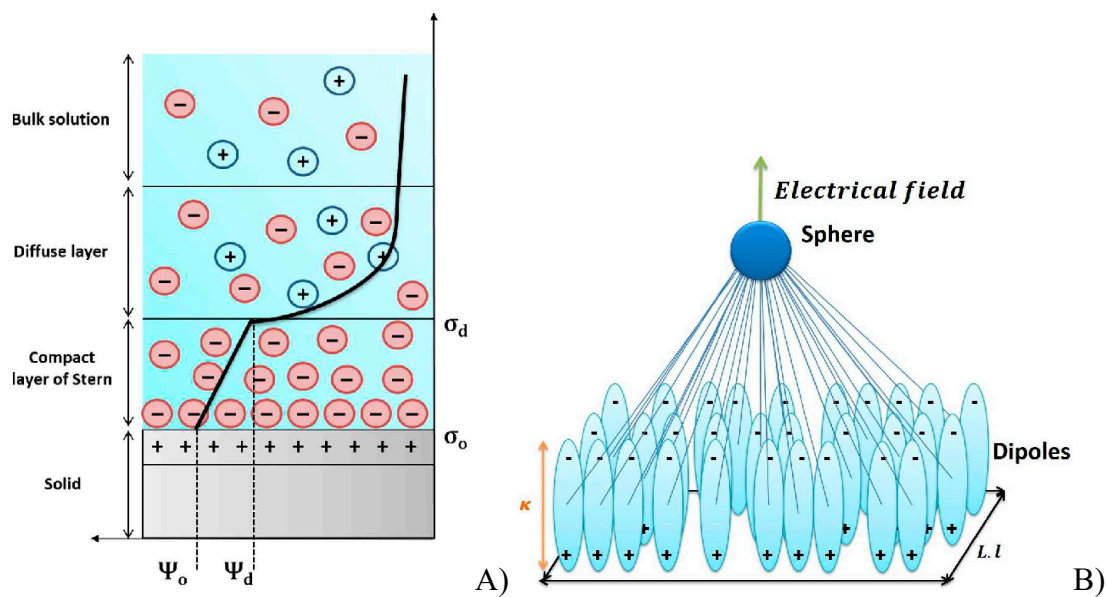

Figure S3: A) Ions distributions according to the double electrical layer model; B) General modeling of interaction between charged micro-object and surface for this theory

### Influence of the band number on the sphere

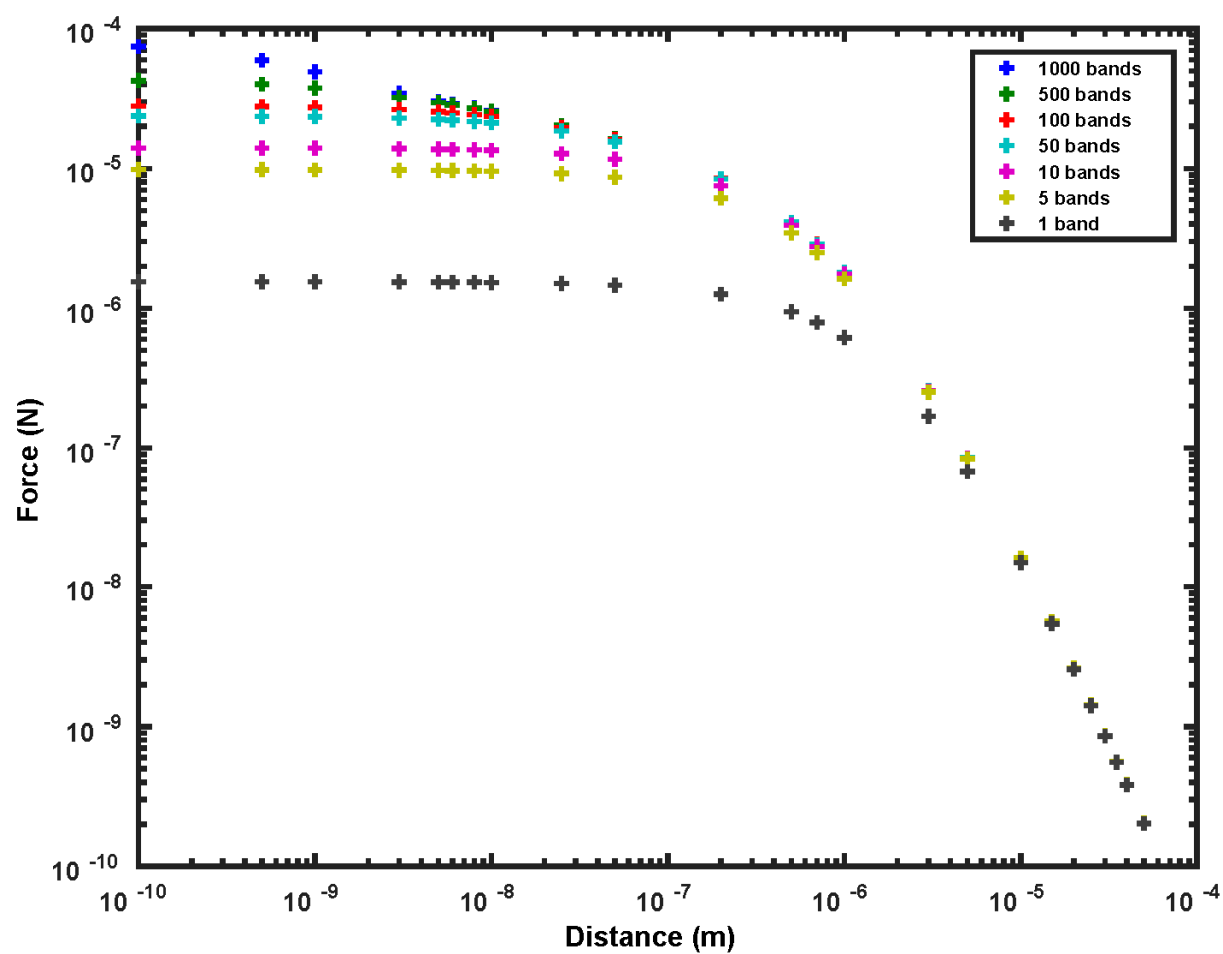

Figure S4: Modeling of the impact of the sphere band number on the force for a borosilicate sphere with a  $10\mu\text{m}$  of diameter.

**Modelling of the repulsive forces and distance between APTES film on surface and on borosilicate sphere glued on the tip extremity**

The both surface charge were taken to  $0.02 \text{ charge/nm}^2$  measured by zetasizer.

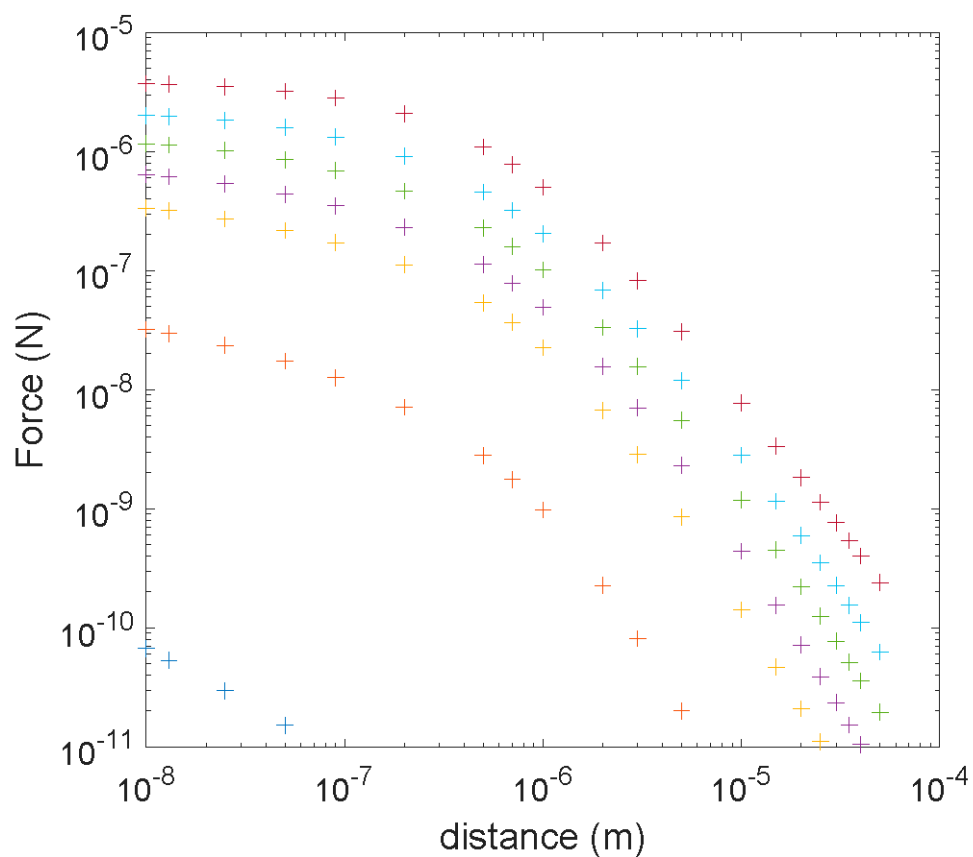

Figure S5: Modelling of the repulsive forces and distance between APTES film on surface and on different diameter size of borosilicate sphere glued on the tip extremity

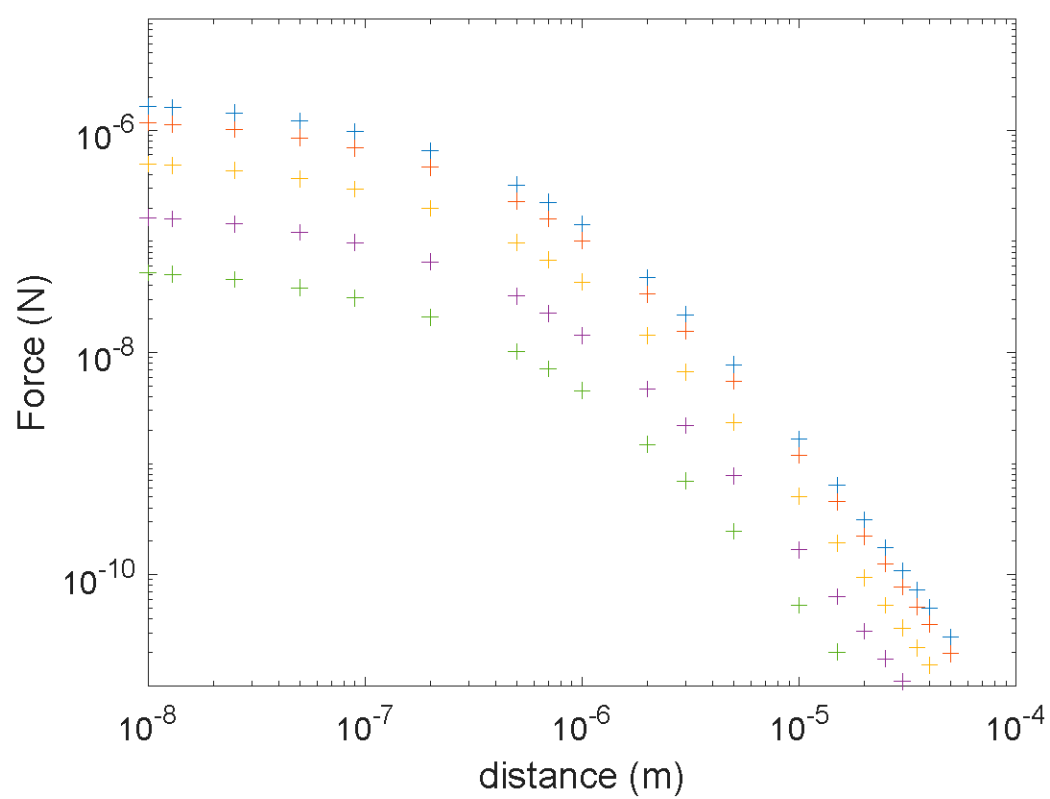

Figure S6: Modelling of the repulsive forces and distance between APTES film on surface and on 10 $\mu$ m borosilicate sphere glued on the tip extremity for different ionic strength.

## Polypyrrole film

- Electrodeposition localization

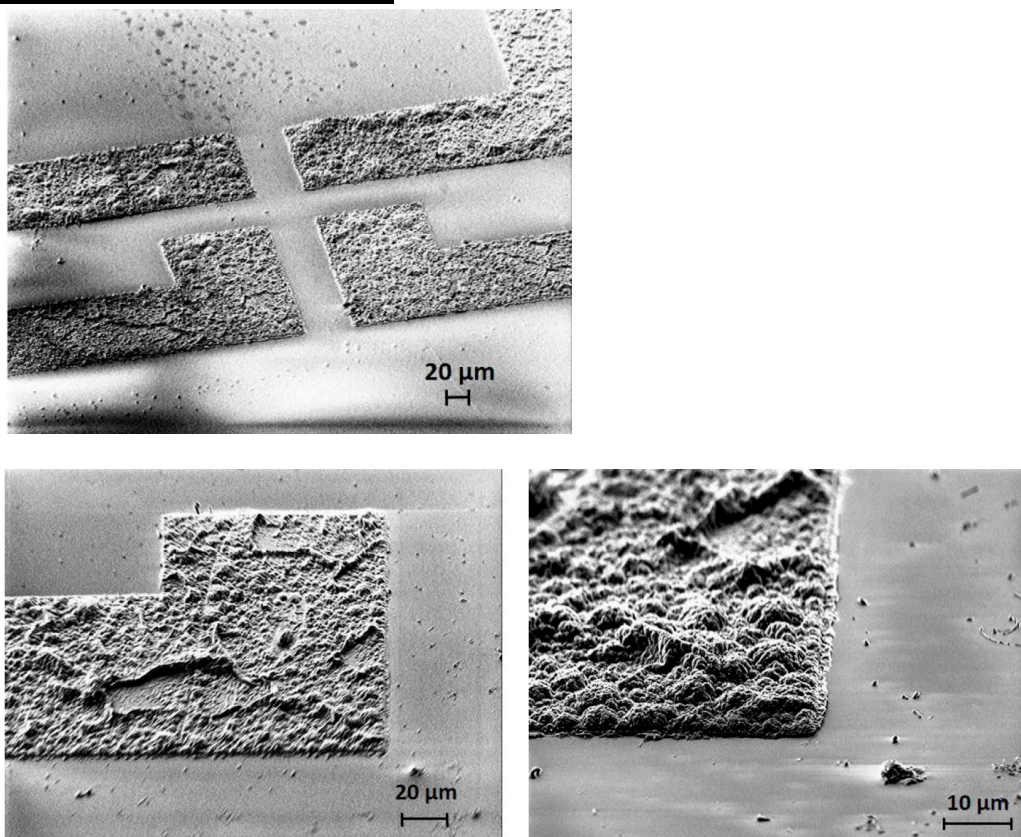

Figure S7: SEM images of the electrodeposition localization of polypyrrole with  $\text{LiClO}_4$  on a gold electrode

We observe the right localization of the deposit on the conductive polymer whose morphology (cabbages flower) is a characteristic of the polypyrrole deposited with  $\text{LiClO}_4$ .

- Current density

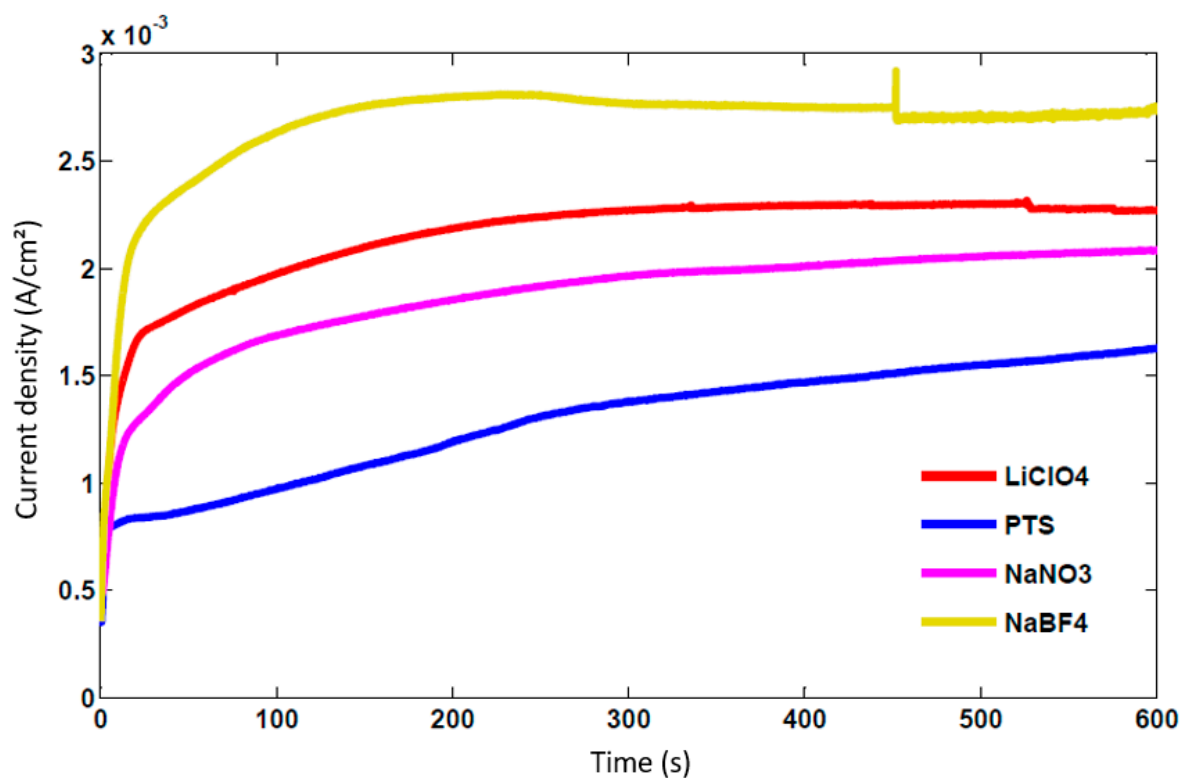

Figure S8: Evolution of charge density with time for different supporting salts.

- SEM pictures

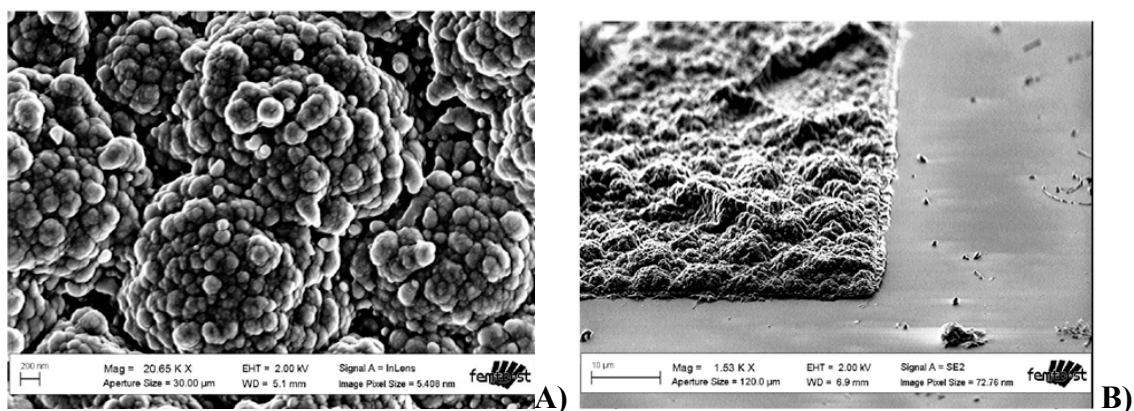

Figure S9: SEM image of the PPy/LiClO<sub>4</sub> film



- **Morphology**

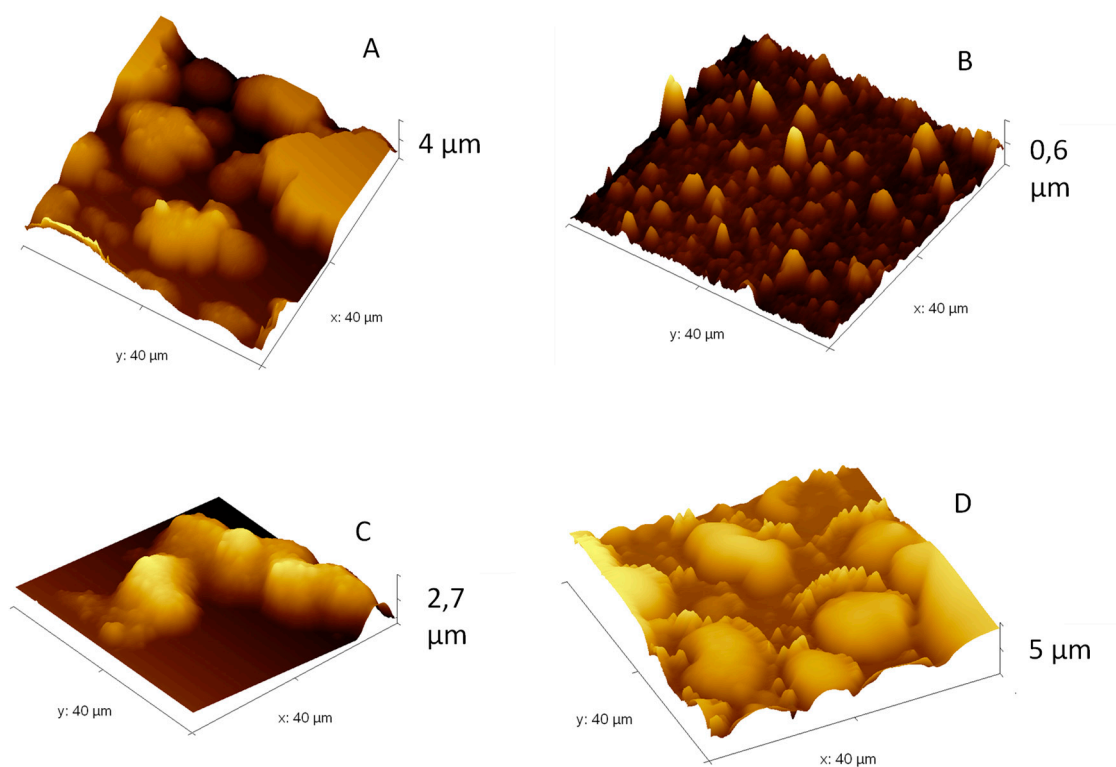

Figure S10: Polypyrrole film morphology versus the counter-ion used: A)  $\text{ClO}_4^-$ , B) PTS, C)  $\text{NO}_3^-$  and D)  $\text{BF}_4^-$ .

- Repulsive force

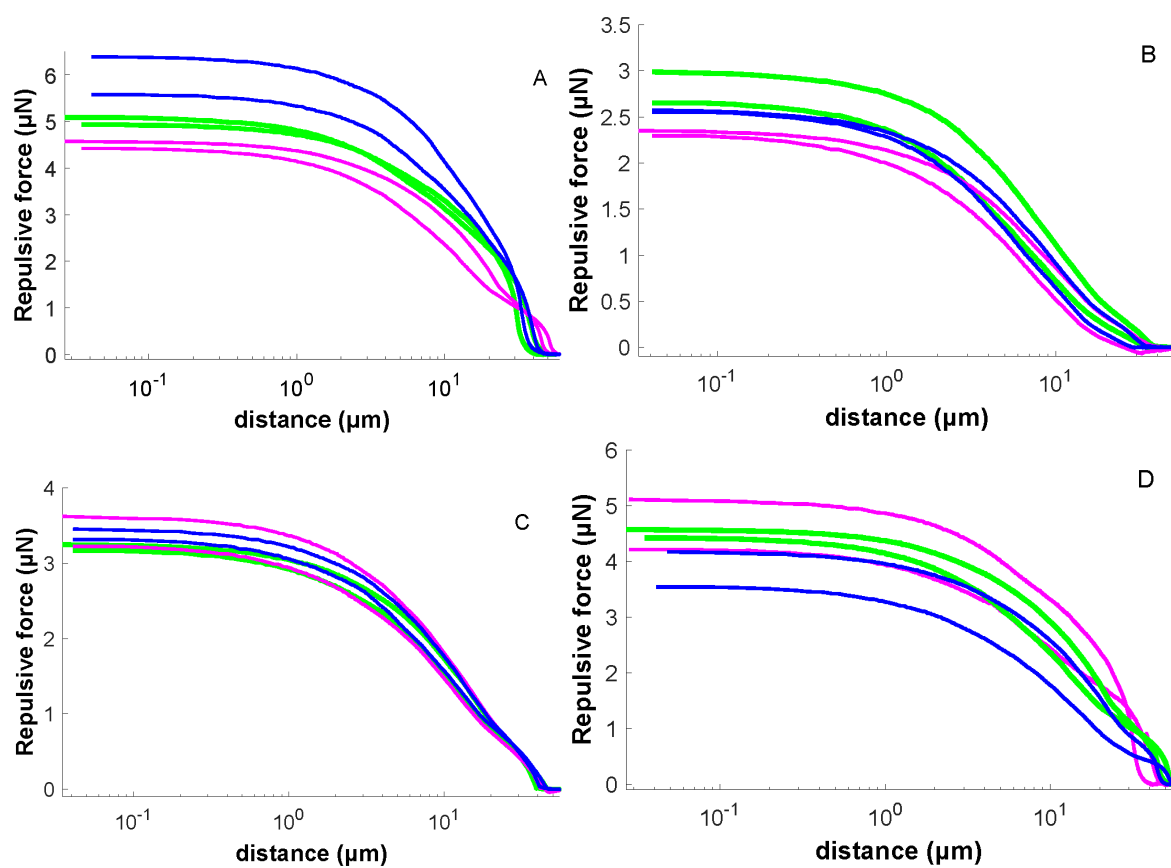

Figure S11: Repulsive force measured at pH 2 at three different points on the polypyrrole film electrodeposited with: A)  $\text{ClO}_4^-$ , B) PTS, C)  $\text{NO}_3^-$  and D)  $\text{BF}_4^-$ .

## Electrophoresis simulation

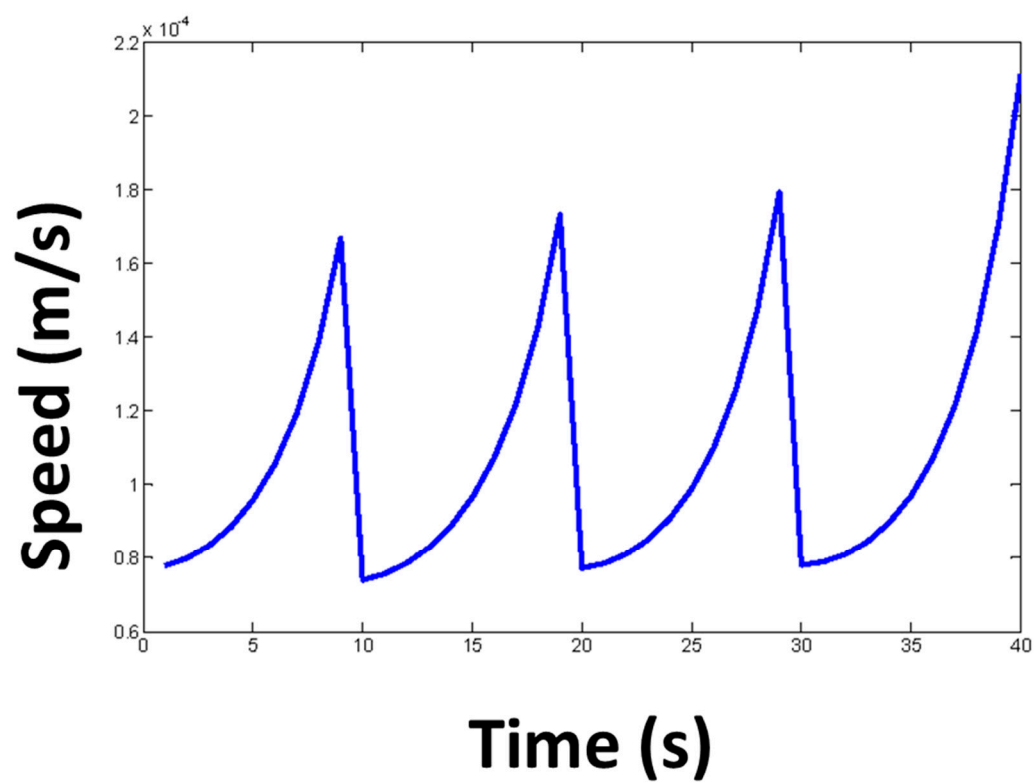

Figure S12: Electrophoresis simulation of functionalized microsphere

## Micro-object rotation

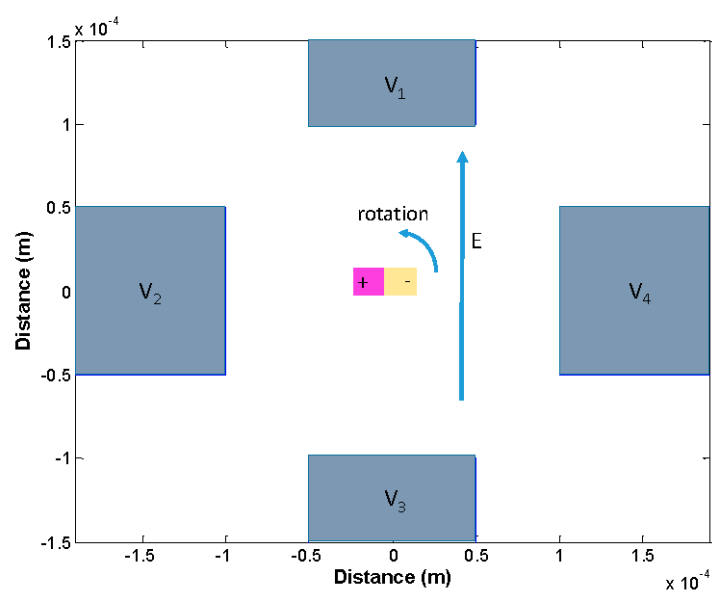

Figure S13: Rotation simulation of a micro-object functionalized by two molecules of opposite charge.
